# Supplementary material for: Efficient degradation of reactive brilliant red on the first open-framework borate-rich cadmium borophosphate
Source: Royal Society of Chemistry journal article supplement (doi:10.1039/d1ce01449h), 2021-12-13
Supplement: d1ce01449h1.pdf [file d1ce01449h1.pdf]

## Supporting Information

### Caption:

**Section 1:** Experimental Section.

**Section 2:** Structure determination.

**Figure S1.** The structure for the FBU of the borophosphate anion.

**Figure S2.** The EDS spectrum for **1**.

**Figure S3.** The simulated, experimental (as-synthesized, **1**) and experimental after performing ion exchange (recovered) powder XRD patterns.

**Figure S4.** The IR spectrum for **1**.

**Figure S5.** The luminescence spectra (a: emission curve; b: excitation curve) for **1**.

**Figure S6.** The CIE (1931) chromaticity diagram for **1**.

**Figure S7.** The EDS spectrum for ion-exchanged **1** with Na<sup>+</sup> cations.

**Figure S8.** The TG curve for **1**.

**Table S1.** Selected bond lengths (Å) and bond angles (°) for **1**.

**Table S2.** The BVS values for Cd(1), B(1), B(2) and P(1) sites in **1**.

### Section 1: Experimental Section:

Compound **1** can be prepared by means of the boric acid reflux method. Typically, a mixture of  $\text{H}_3\text{BO}_3$ ,  $\text{Na}_2\text{B}_4\text{O}_7 \cdot 10\text{H}_2\text{O}$ ,  $\text{Na}_2\text{HPO}_4 \cdot 12\text{H}_2\text{O}$ ,  $\text{CH}_3\text{COOK}$  and  $\text{Cd}(\text{CH}_3\text{COO})_2 \cdot 2\text{H}_2\text{O}$  with the molar composition of 20: 1.5: 1 :2: 1.6 was transferred into a 50 mL Teflon-lined stainless steel autoclave and heated at 200 °C for 6 days. After the mixture was slowly cooled to RT, colourless columnar crystals were isolated. The crystals were washed with deionized water (50 °C) until the residual  $\text{H}_3\text{BO}_3$  was completely removed, purified ultrasonically, and dried in air. The yield of **1** is about 68% based on  $\text{Cd}(\text{CH}_3\text{COO})_2 \cdot 2\text{H}_2\text{O}$ . In addition, we tried to prepare compound **1** without adding  $\text{Na}_2\text{B}_4\text{O}_7 \cdot 10\text{H}_2\text{O}$  during the synthesis process, unfortunately, **1** could not be synthesized by using the same synthesis method, we only obtained the known colorless prism crystals  $\text{NaCd}(\text{H}_2\text{O})_2[\text{BP}_2\text{O}_8] \cdot 0.8\text{H}_2\text{O}$  with the B/P ratio of 1/2 which was previously reported by kniep *et. al.* in 2003.

### Section 2: Structure determination:

The suitable single crystal (0.24 × 0.22 × 0.15 mm) was selected for single-crystal X-ray diffraction. The data were collected on a Bruker APEX-II CCD diffractometer (Mo-K $\alpha$ ,  $\lambda = 0.71073 \text{ \AA}$ ) at 293(2) K. A total of 8754 reflections were collected, of which 1113 reflections were unique ( $R_{int} = 0.0477$ ). The structure was solved by the direct method and refined by the full-matrix least-squares on  $F^2$  using the *SHELXTL* crystallographic software package. The Cd, B, P, O, Na and K atoms could be located from a difference Fourier map. The H atoms bonded to protonated O(7) have been added, the H atoms attached to O(1W) and O(2W) were not added due to their disorders. The non-hydrogen atoms were refined anisotropically. Crystal data:  $\text{B}_9\text{Cd}_3\text{H}_7\text{KNa}_5\text{O}_{38}\text{P}_6$ , Hexagonal, space group  $P6_3/m$  (no. 176),  $a = 12.071(3) \text{ \AA}$ ,  $b = 12.071(3) \text{ \AA}$ ,  $c = 12.118(2) \text{ \AA}$ ,  $V = 1529.1(6) \text{ \AA}^3$ ,  $Z = 2$ ,  $D_c = 3.009 \text{ g}\cdot\text{cm}^{-3}$ ,  $\mu = 2.737 \text{ mm}^{-1}$ ,  $F(000) = 1320$ ,  $GOF = 1.071$ ,  $R_1 = 0.0919$  and  $wR_2 = 0.2092$  ( $I > 2\sigma(I)$ ). The selected bond lengths and angles of **1** are provided in Table S1.

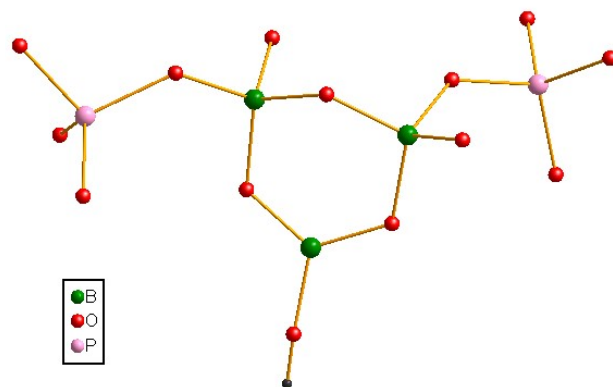

**Figure S1.** The structure for the FBU of the borophosphate anion.

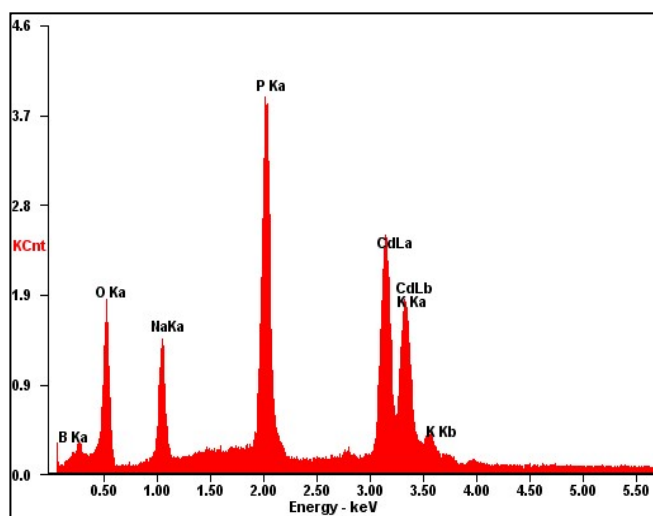

**Figure S2.** The EDS spectrum for 1.

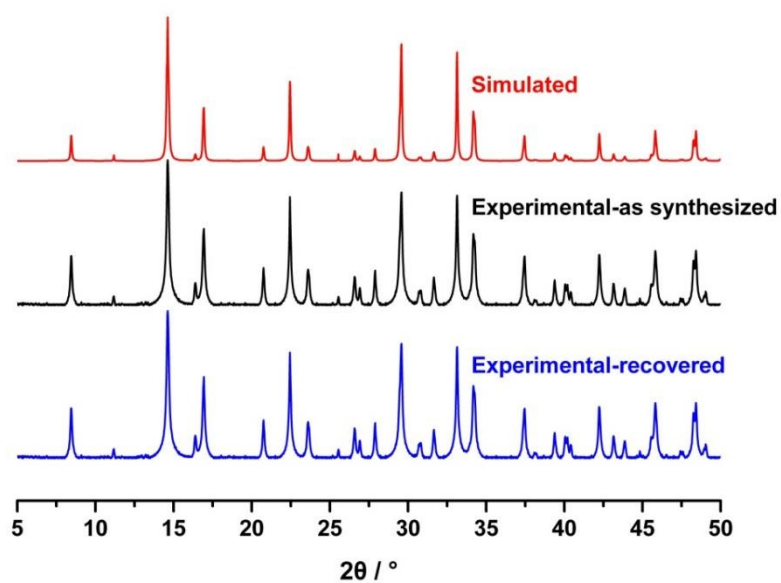

**Figure S3.** The simulated, experimental (as-synthesized, 1) and experimental after performing ion exchange (recovered) powder XRD patterns.

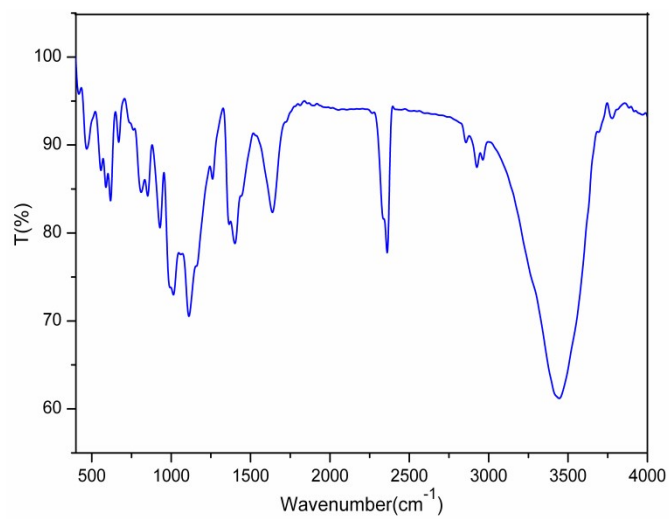

**Figure S4.** The IR spectrum for **1**.

**Figure S5.** The luminescence spectra (a: emission curve; b: excitation curve) for **1**.

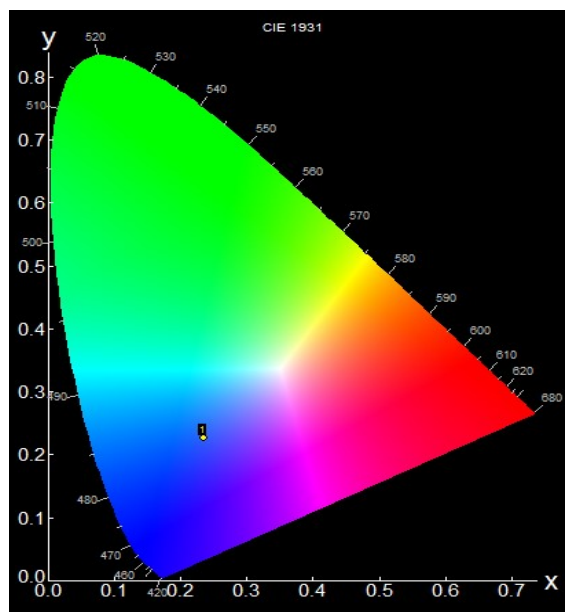

**Figure S6.** The CIE (1931) chromaticity diagram for **1**.

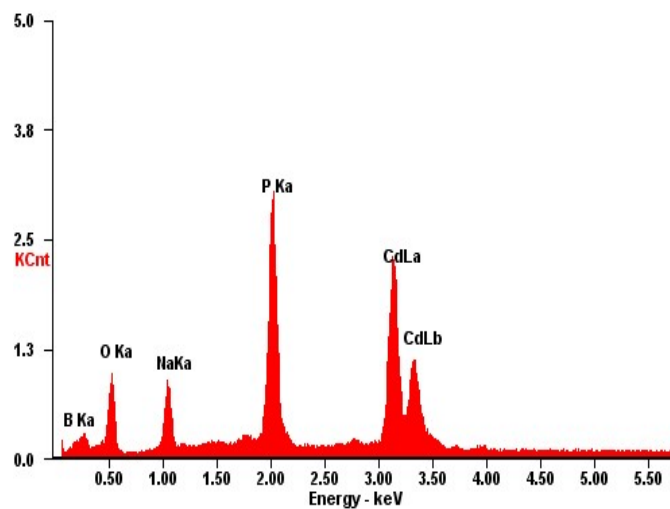

**Figure S7.** The EDS spectrum for ion-exchanged **1** with Na<sup>+</sup> cations.

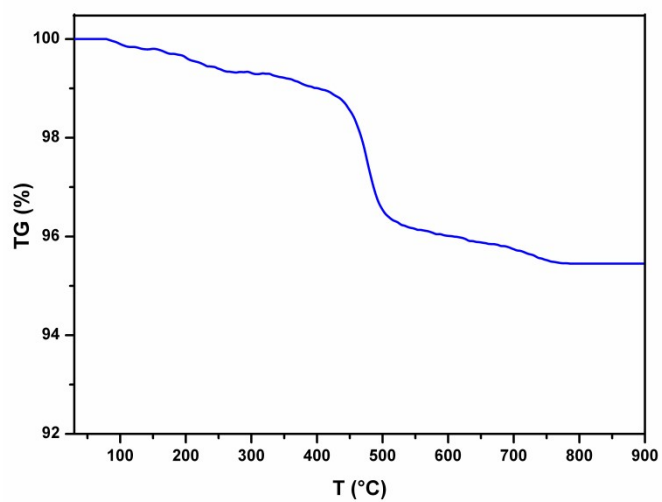

**Figure S8.** The TG curve for **1**.

**Table S1.** Selected bond lengths (Å) and bond angles (°) for **1**.

| <i>Bond</i>  | <i>Bond lengths</i> | <i>Bond</i>  | <i>Bond lengths</i> |
|--------------|---------------------|--------------|---------------------|
| Cd1-O4       | 2.222(10)           | B1-O6        | 1.498(18)           |
| Cd1-O4#1     | 2.222(10)           | B2-O6        | 1.346(14)           |
| Cd1-O5#2     | 2.223(9)            | B2-O6#4      | 1.346(14)           |
| Cd1-O5#3     | 2.223(9)            | B2-O7        | 1.37(3)             |
| Cd1-O6       | 2.370(9)            | P1-O2        | 1.552(9)            |
| Cd1-O6#1     | 2.370(9)            | P1-O3        | 1.543(10)           |
| B1-O1#4      | 1.438(17)           | P1-O4        | 1.508(10)           |
| B1-O2        | 1.507(17)           | P1-O5        | 1.503(9)            |
| B1-O3#5      | 1.443(18)           |              |                     |
| <b>Angle</b> | <b>Degree(°)</b>    | <b>Angle</b> | <b>Degree(°)</b>    |
| O4-Cd1-O4#6  | 180.0(7)            | O1-B1-O2     | 108.0(11)           |
| O4-Cd1-O5#6  | 90.2(4)             | O1-B1-O3#10  | 109.7(12)           |
| O4-Cd1-O5#7  | 89.8(4)             | O1-B1-O6#10  | 110.2(12)           |
| O4-Cd1-O5#8  | 89.8(4)             | O3-B1-O2#10  | 109.0(12)           |
| O4-Cd1-O5#7  | 90.2(4)             | O3-B1-O6#10  | 111.2(11)           |
| O4-Cd1-O6#8  | 87.8(4)             | O6-B1-O2#10  | 108.6(11)           |
| O4-Cd1-O6#7  | 87.8(4)             | O6-B2-O6#11  | 122.4(18)           |
| O4-Cd1-O6#9  | 92.2(4)             | O6-B2-O7#11  | 118.8(9)            |
| O4-Cd1-O6#7  | 92.2(4)             | O6-B2-O7     | 118.8(9)            |
| O5-Cd1-O5#7  | 180.0(4)            | O2-P1-O3     | 105.5(6)            |
| O5-Cd1-O6#7  | 98.4(3)             | O2-P1-O4     | 112.4(7)            |
| O5-Cd1-O6#7  | 98.4(3)             | O2-P1-O5     | 104.7(6)            |
| O5-Cd1-O6    | 81.6(3)             | O3-P1-O4     | 109.7(7)            |
| O5-Cd1-O6#7  | 81.6(3)             | O3-P1-O5     | 111.7(6)            |
| O6-Cd1-O6#7  | 180.000(2)          | O4-P1-O5     | 112.6(6)            |

Symmetry transformations used to generate equivalent atoms:

- #1:  $-x, 1-y, -z$ ;      #2:  $x-y, x, -z$ ;      #3:  $-x+y, 1-x, z$ ;      #4:  $x, y, 1/2 -z$ ;  
#5:  $y, -x+y, -z$ ;      #6:  $1+x-y, x, 1/2+z$ ;      #7:  $2-x, 1-y, 1-z$ ;      #8:  $2-x+y, 1-x, 3/2-z$ ;  
#9:  $1+x-y, x, 1/2+z$ ;      #10:  $y, -x+y, 1-z$ ;      #11:  $x, y, 3/2-z$ .

**Table S2.** The BVS values for Cd(1), B(1), B(2) and P(1) sites in **1**.

| Bond     | Bond lengths (Å) | BVS values | Sum   |
|----------|------------------|------------|-------|
| Cd1-O4   | 2.222(10)        | 0.423      | 2.254 |
| Cd1-O4#1 | 2.222(10)        | 0.423      |       |
| Cd1-O5#2 | 2.223(9)         | 0.421      |       |
| Cd1-O5#3 | 2.223(9)         | 0.421      |       |
| Cd1-O6   | 2.370(9)         | 0.283      |       |
| Cd1-O6#1 | 2.370(9)         | 0.283      |       |
| B1-O1#4  | 1.438(17)        | 0.834      | 3.058 |
| B1-O2    | 1.507(17)        | 0.692      |       |
| B1-O3#5  | 1.443(18)        | 0.823      |       |
| B1-O6    | 1.498(18)        | 0.709      |       |
| B2-O6    | 1.346(14)        | 1.070      | 3.135 |
| B2-O6#4  | 1.346(14)        | 1.070      |       |
| B2-O7    | 1.37(3)          | 0.995      |       |
| P1-O2    | 1.552(9)         | 1.148      | 4.933 |
| P1-O3    | 1.543(10)        | 1.179      |       |
| P1-O4    | 1.508(10)        | 1.296      |       |
| P1-O5    | 1.503(9)         | 1.310      |       |

Symmetry transformations used to generate equivalent atoms:

#1:  $-x, 1-y, -z$ ; #2:  $x-y, x, -z$ ; #3:  $-x+y, 1-x, z$ ; #4:  $x, y, 1/2 -z$ ; #5:  $y, -x+y, -z$ .
